# Supplementary material for: Temporal Patterns in Sheep Fetal Heart Rate Variability Correlate to Systemic Cytokine Inflammatory Response: A Methodological Exploration of Monitoring Potential Using Complex Signals Bioinformatics
Source: PubMed Central journal article supplement (PMC4839772; doi:10.1371/journal.pone.0153515), 2016-04-21

**A****LPS-exposed**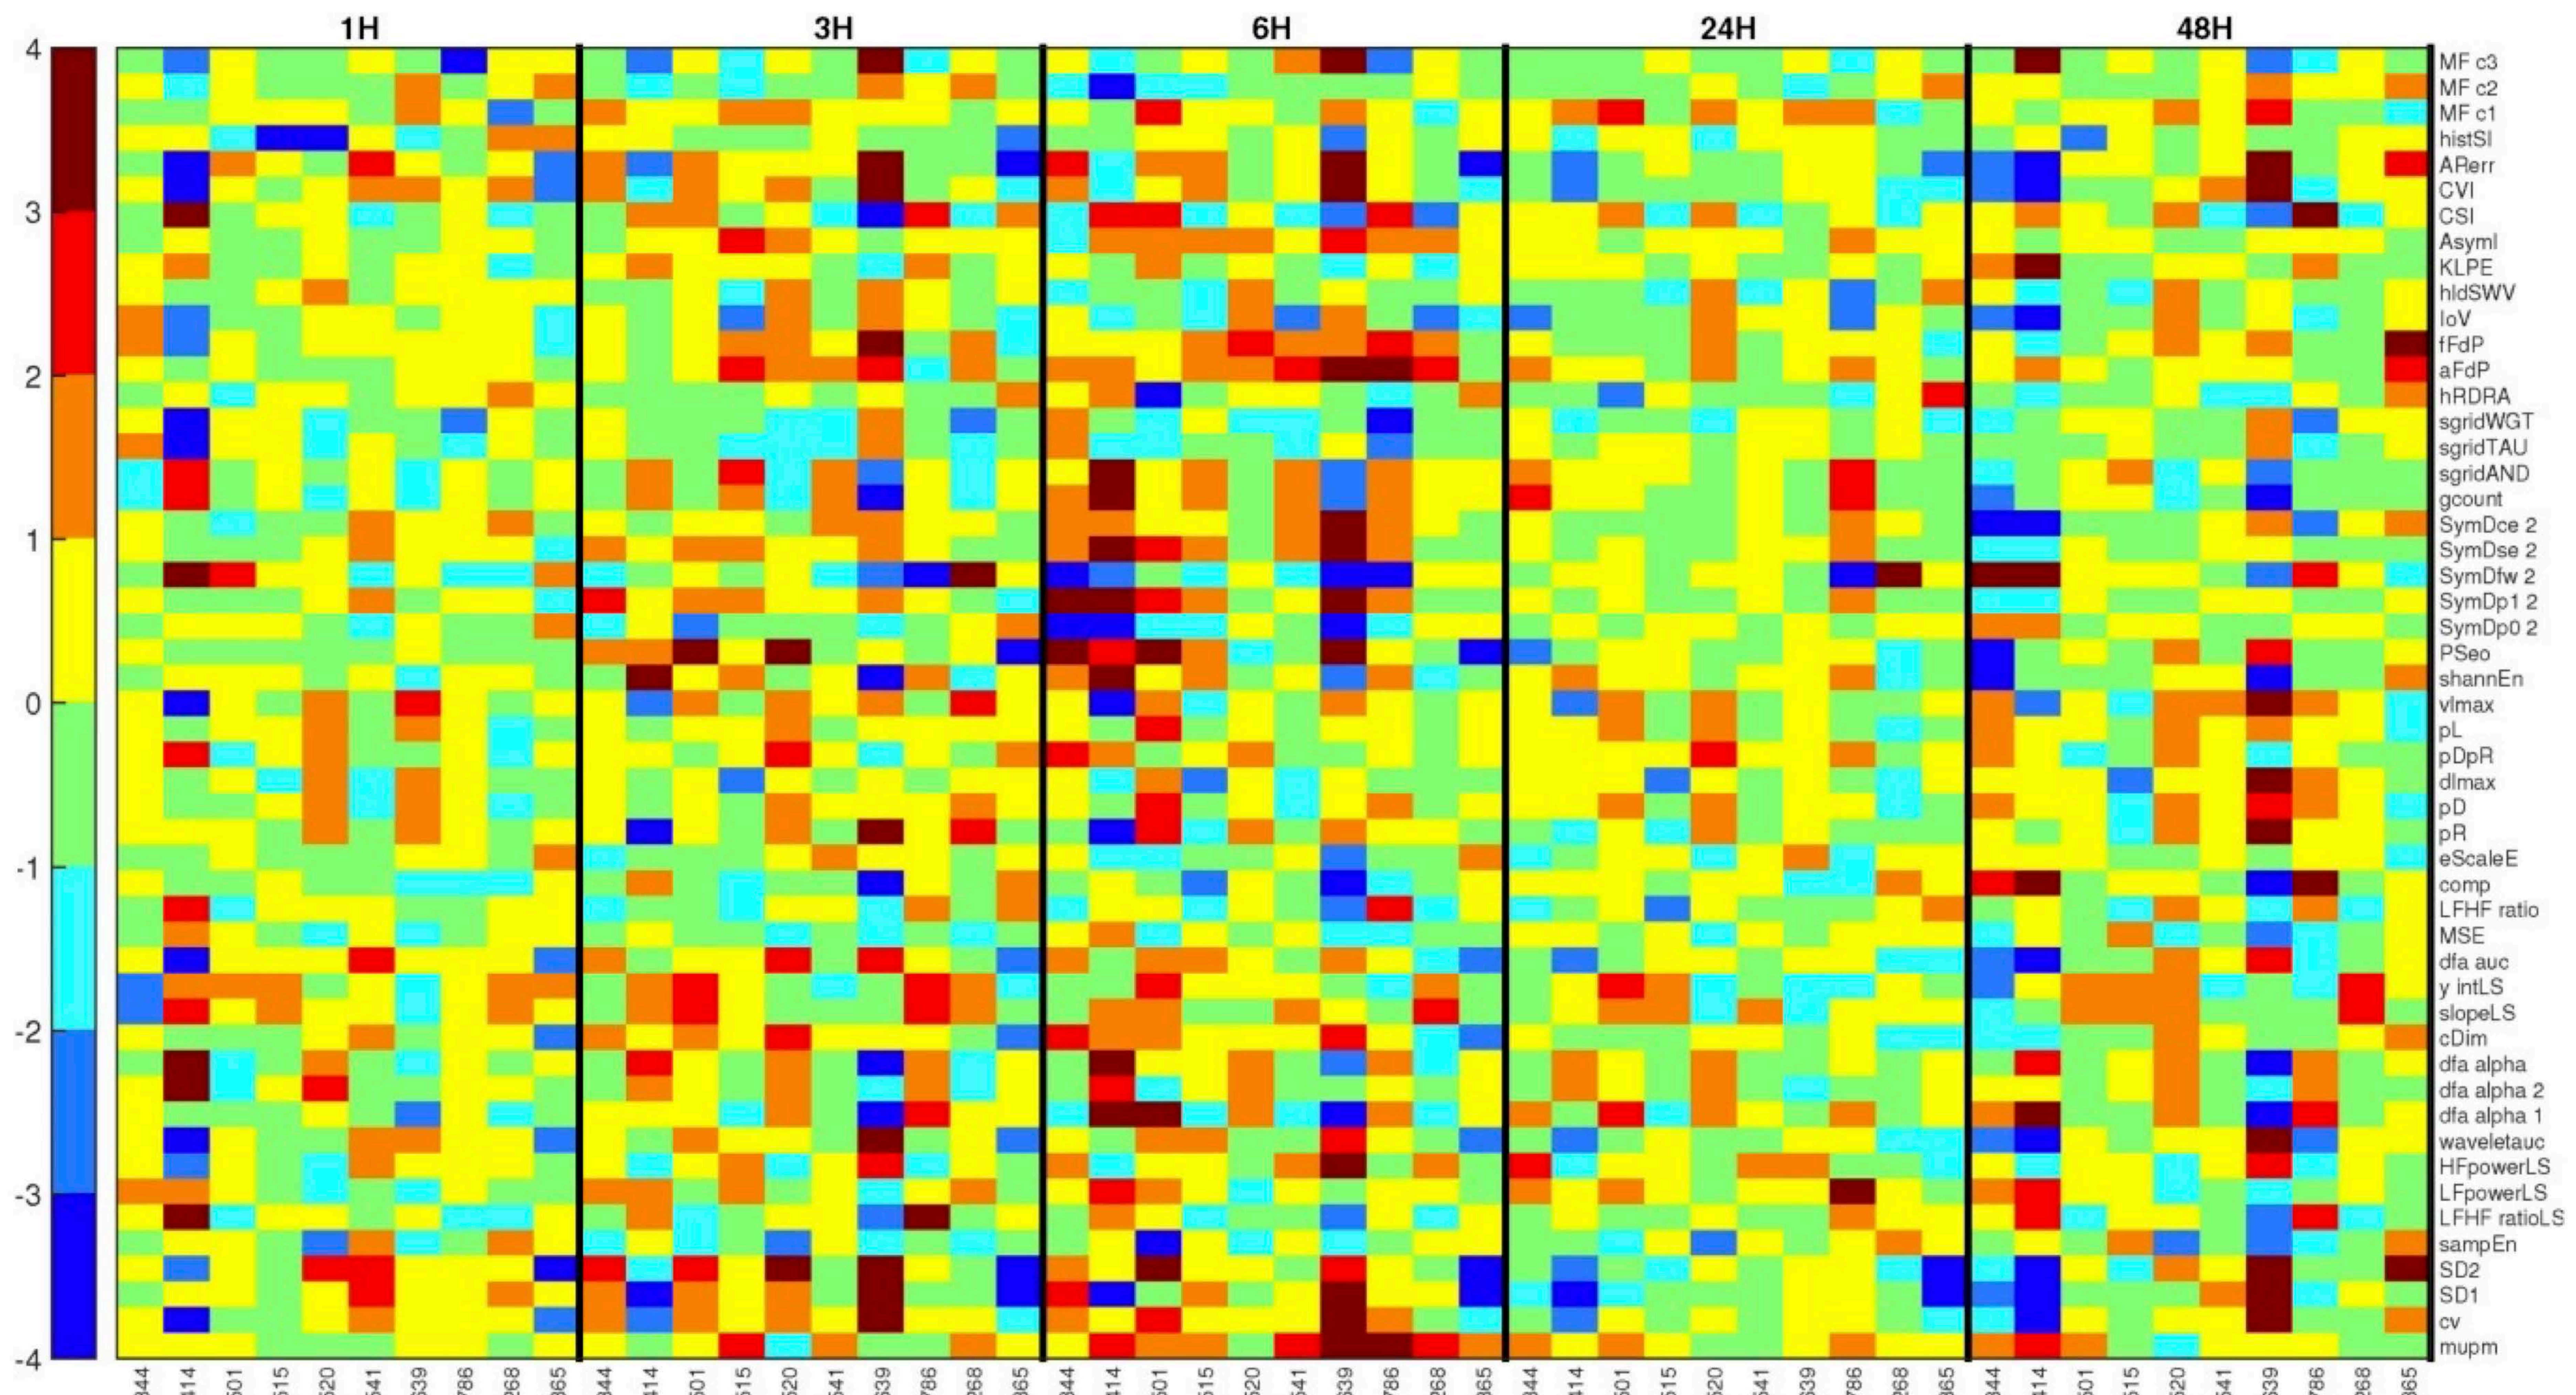**Control**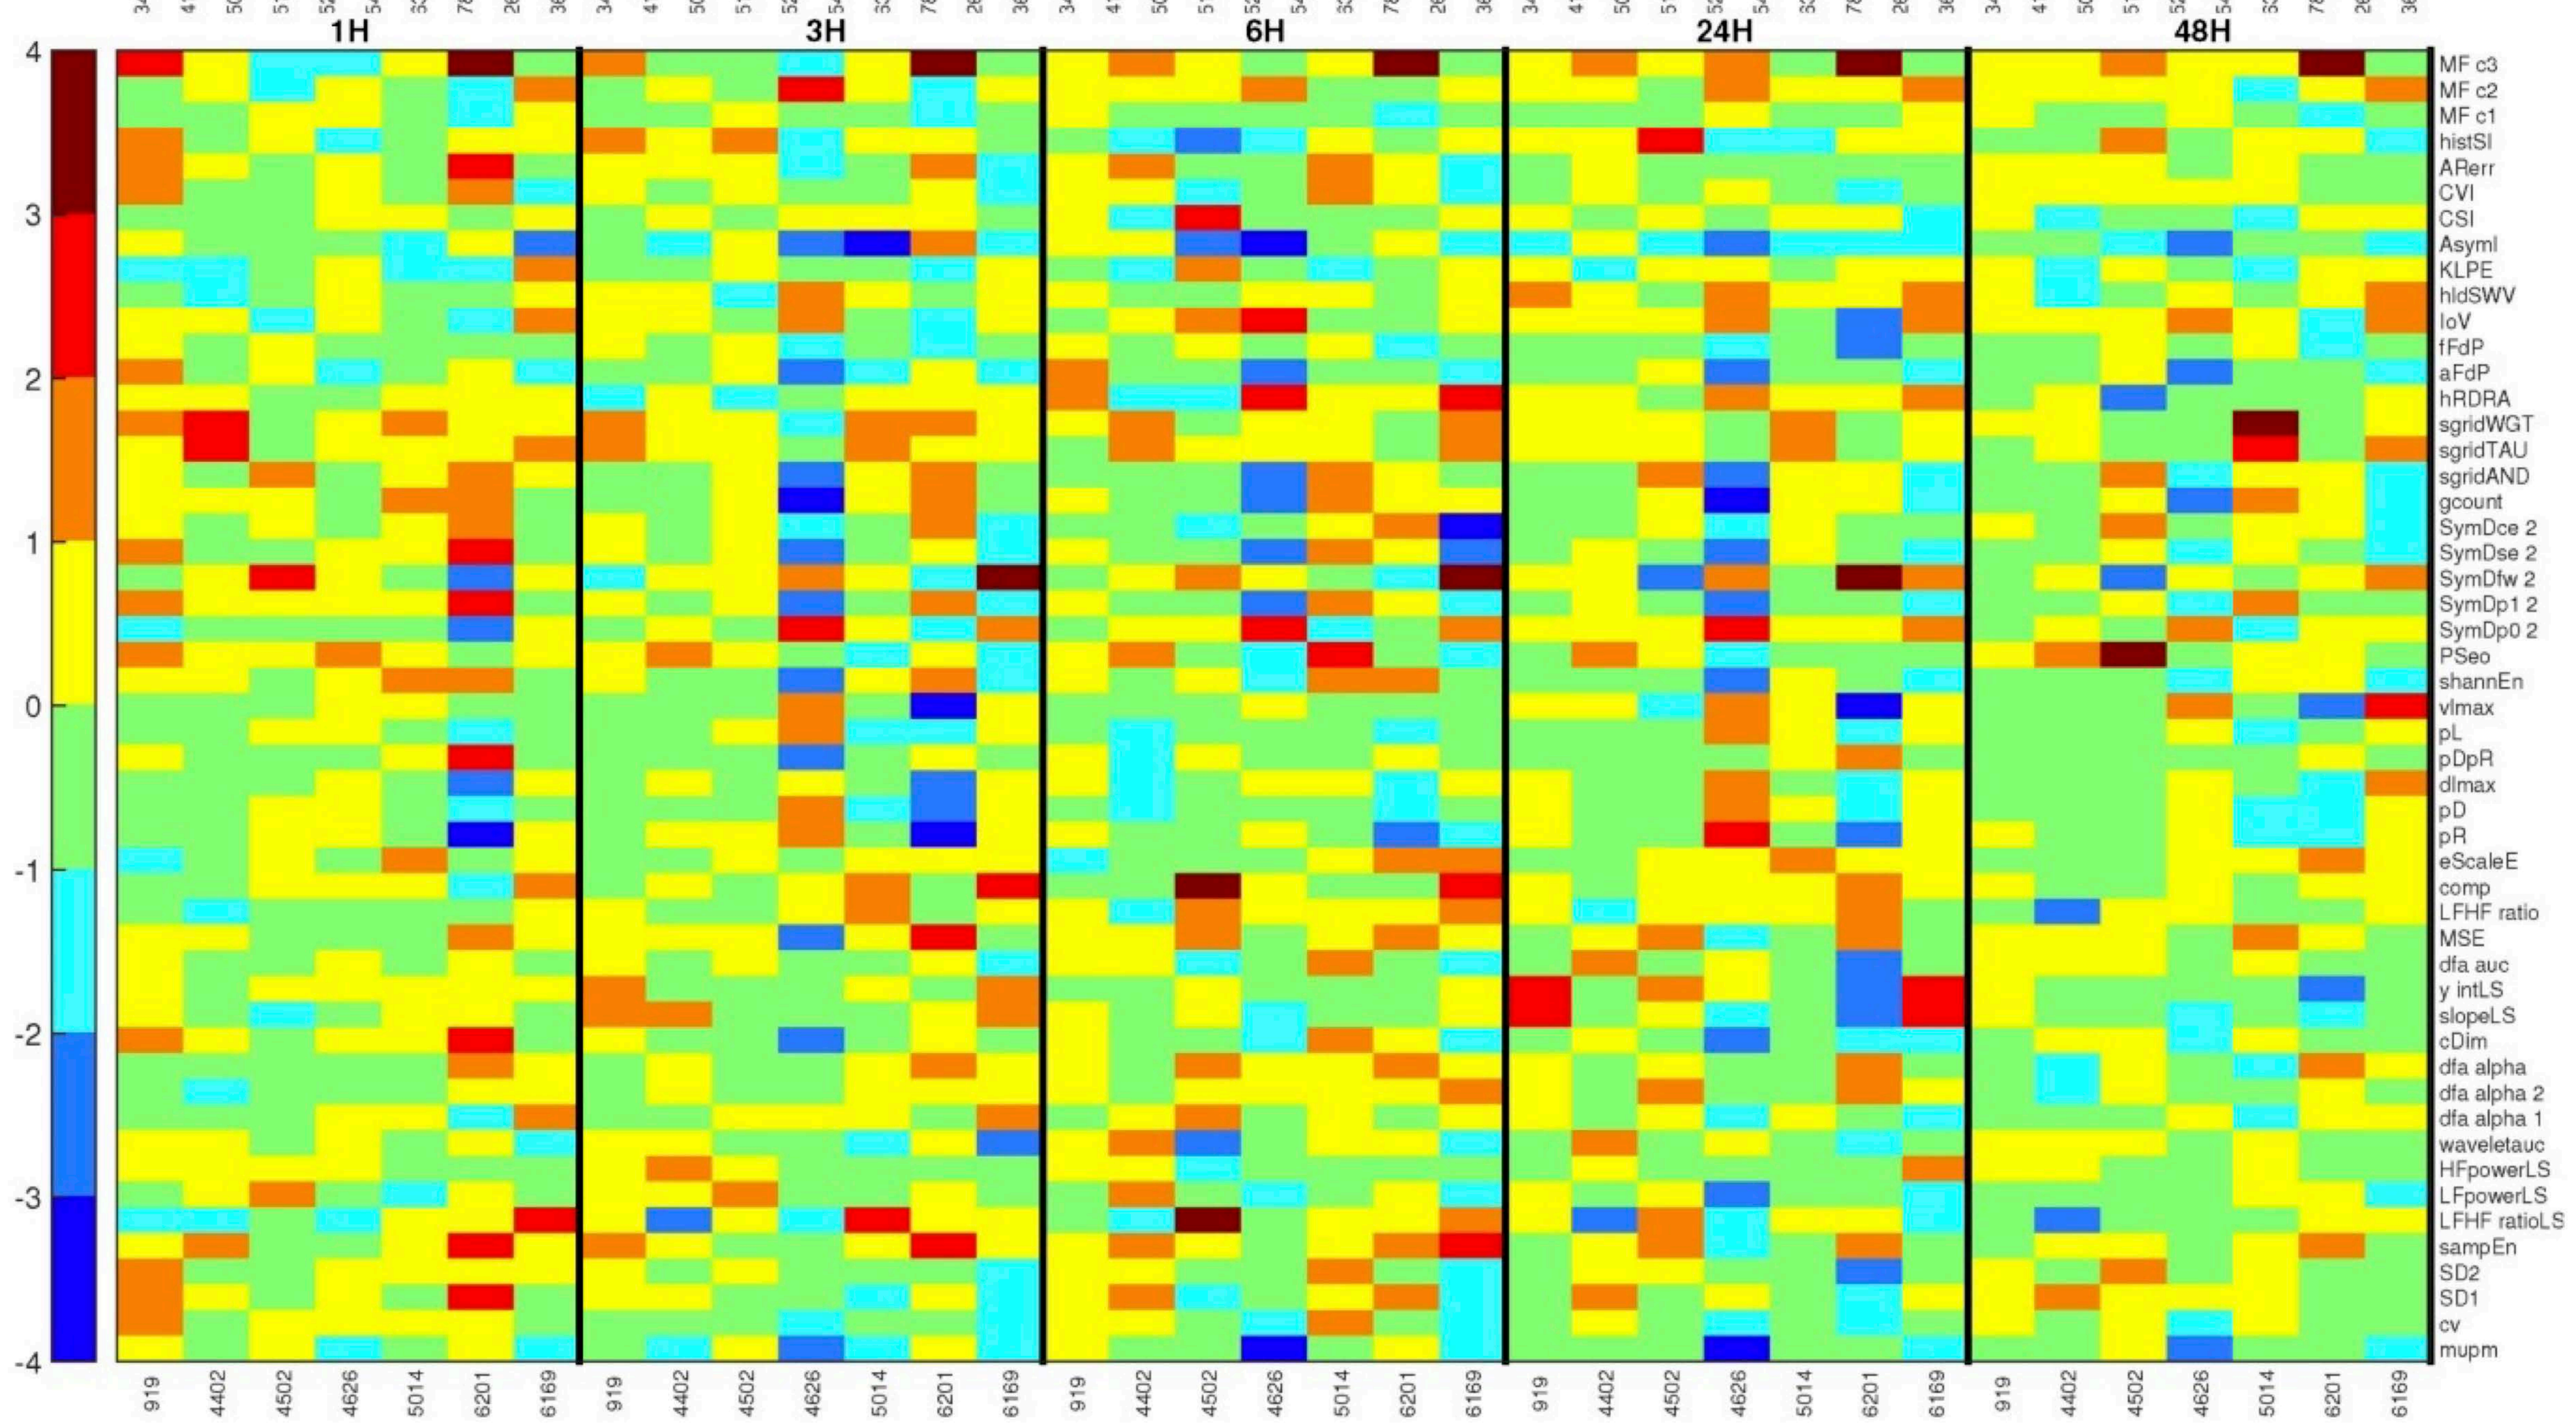

**B****LPS-exposed**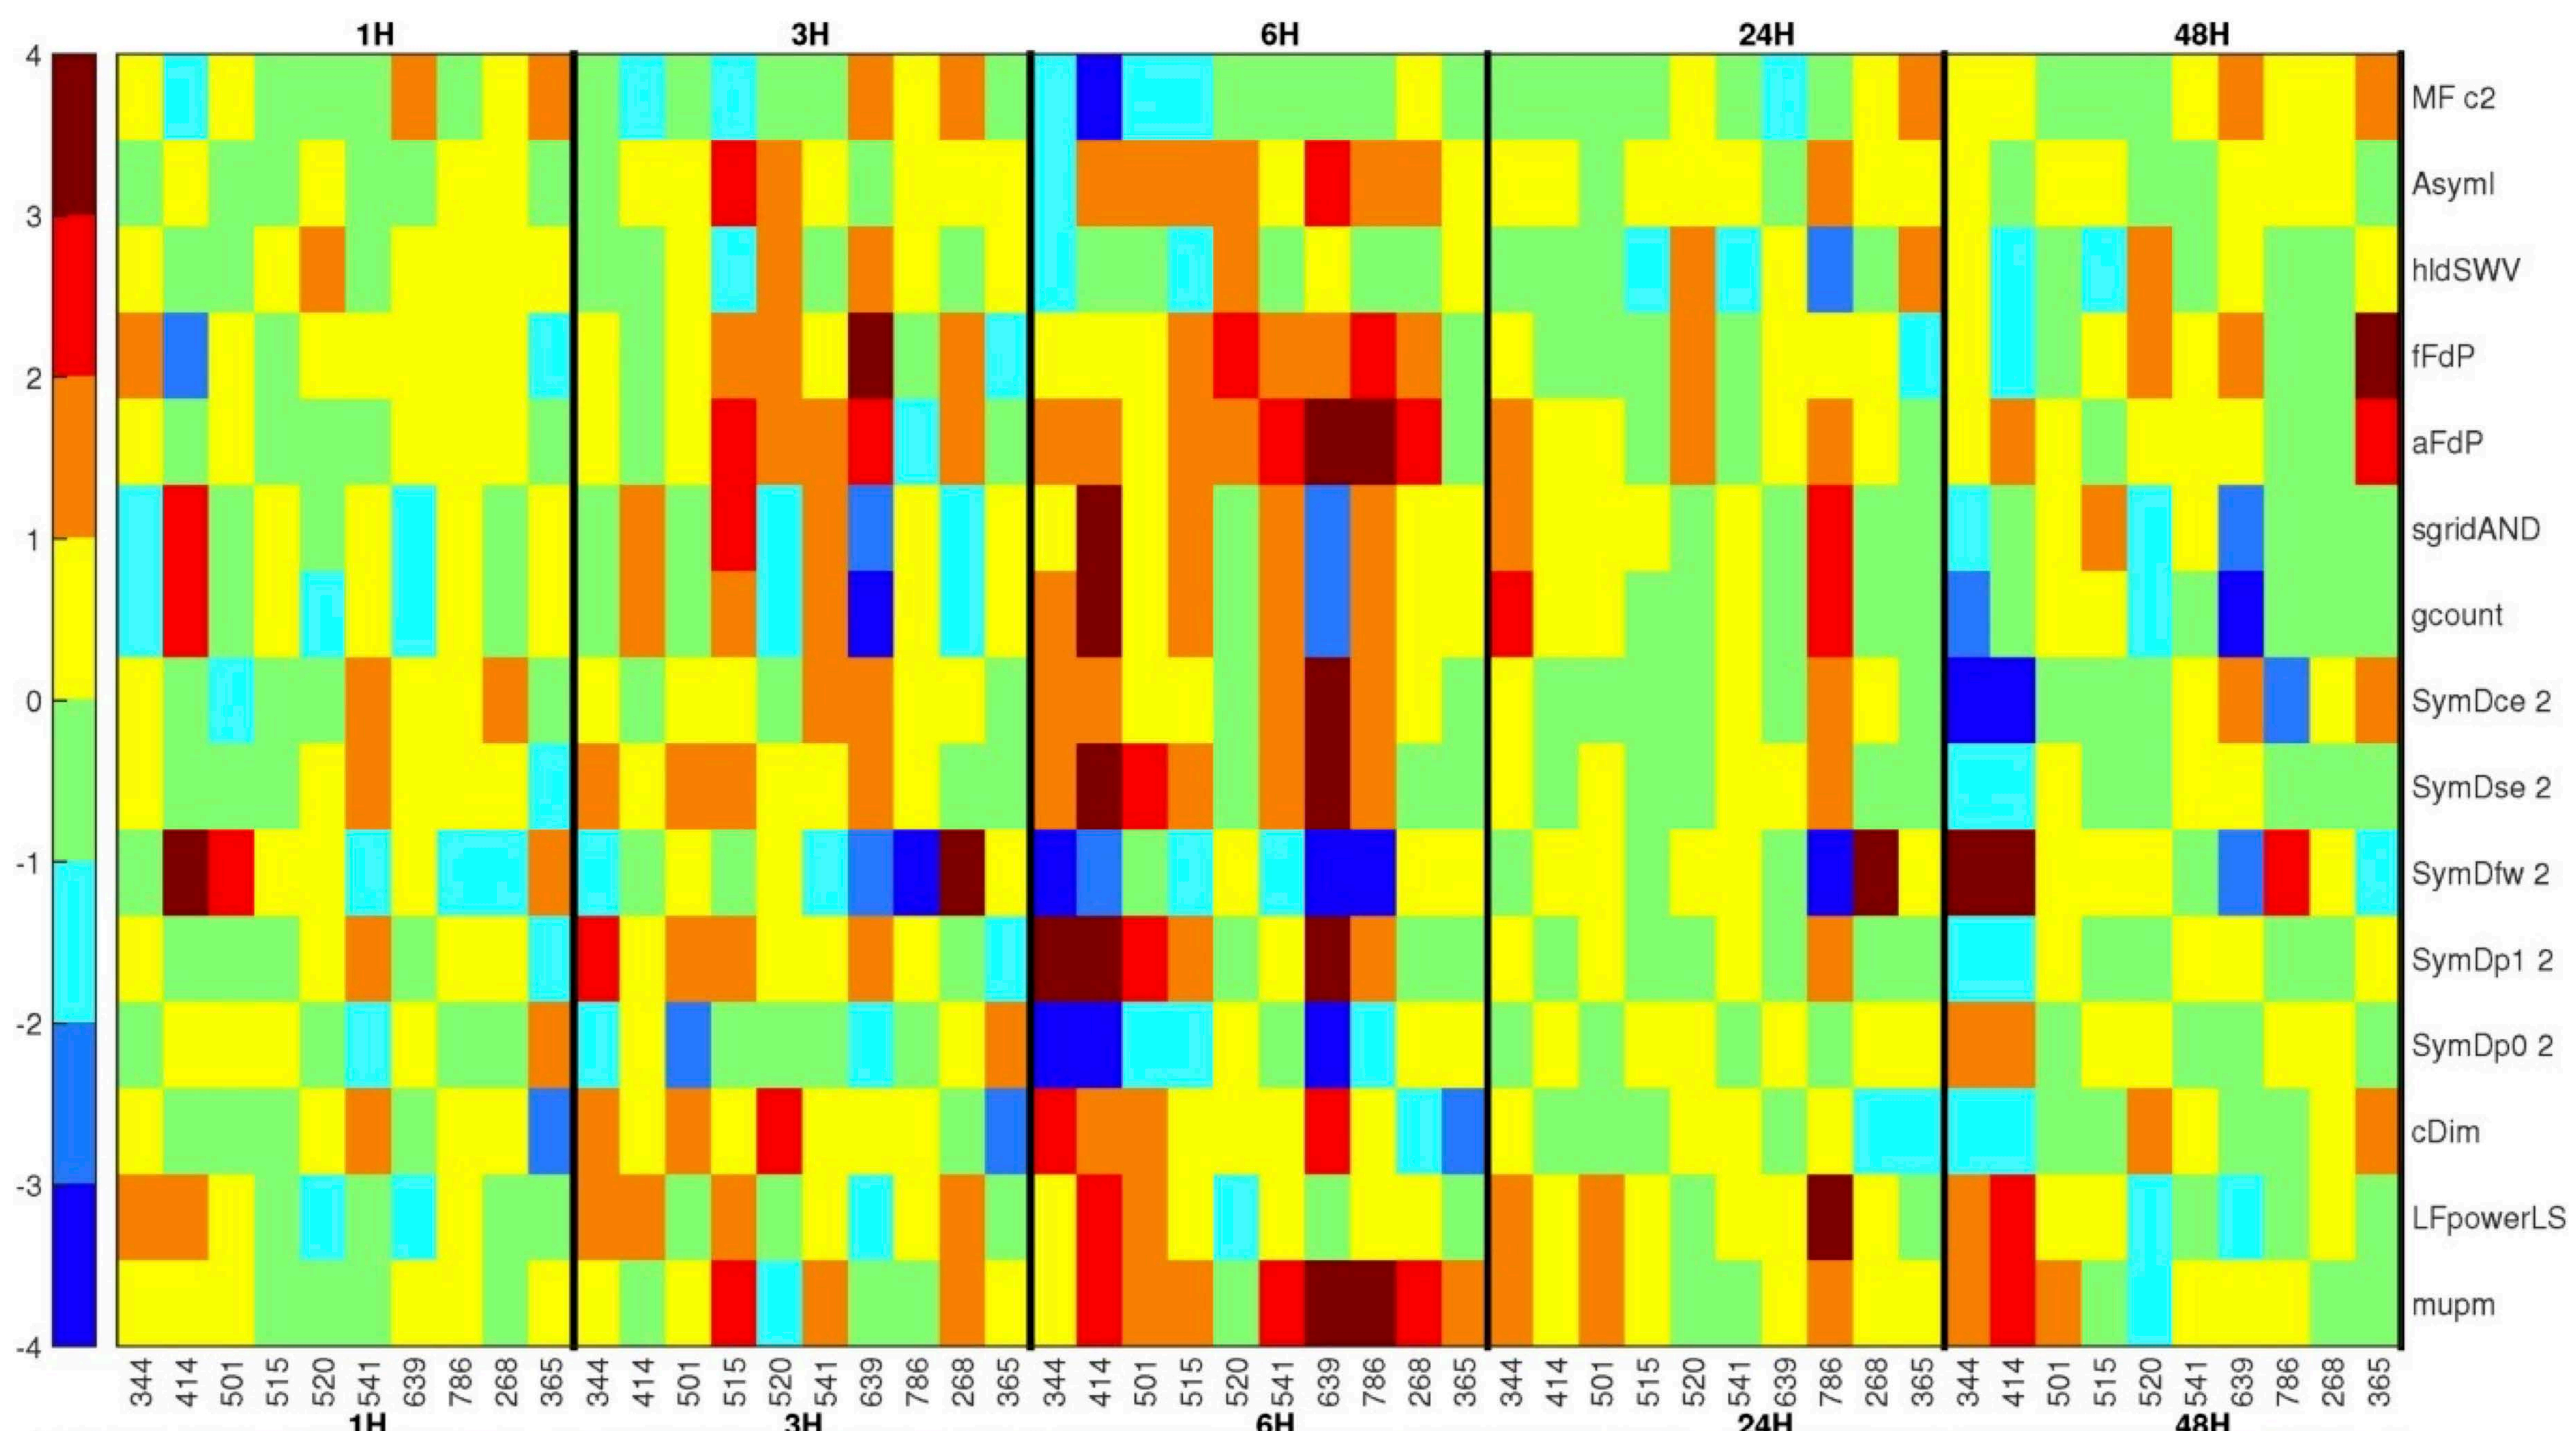**Control**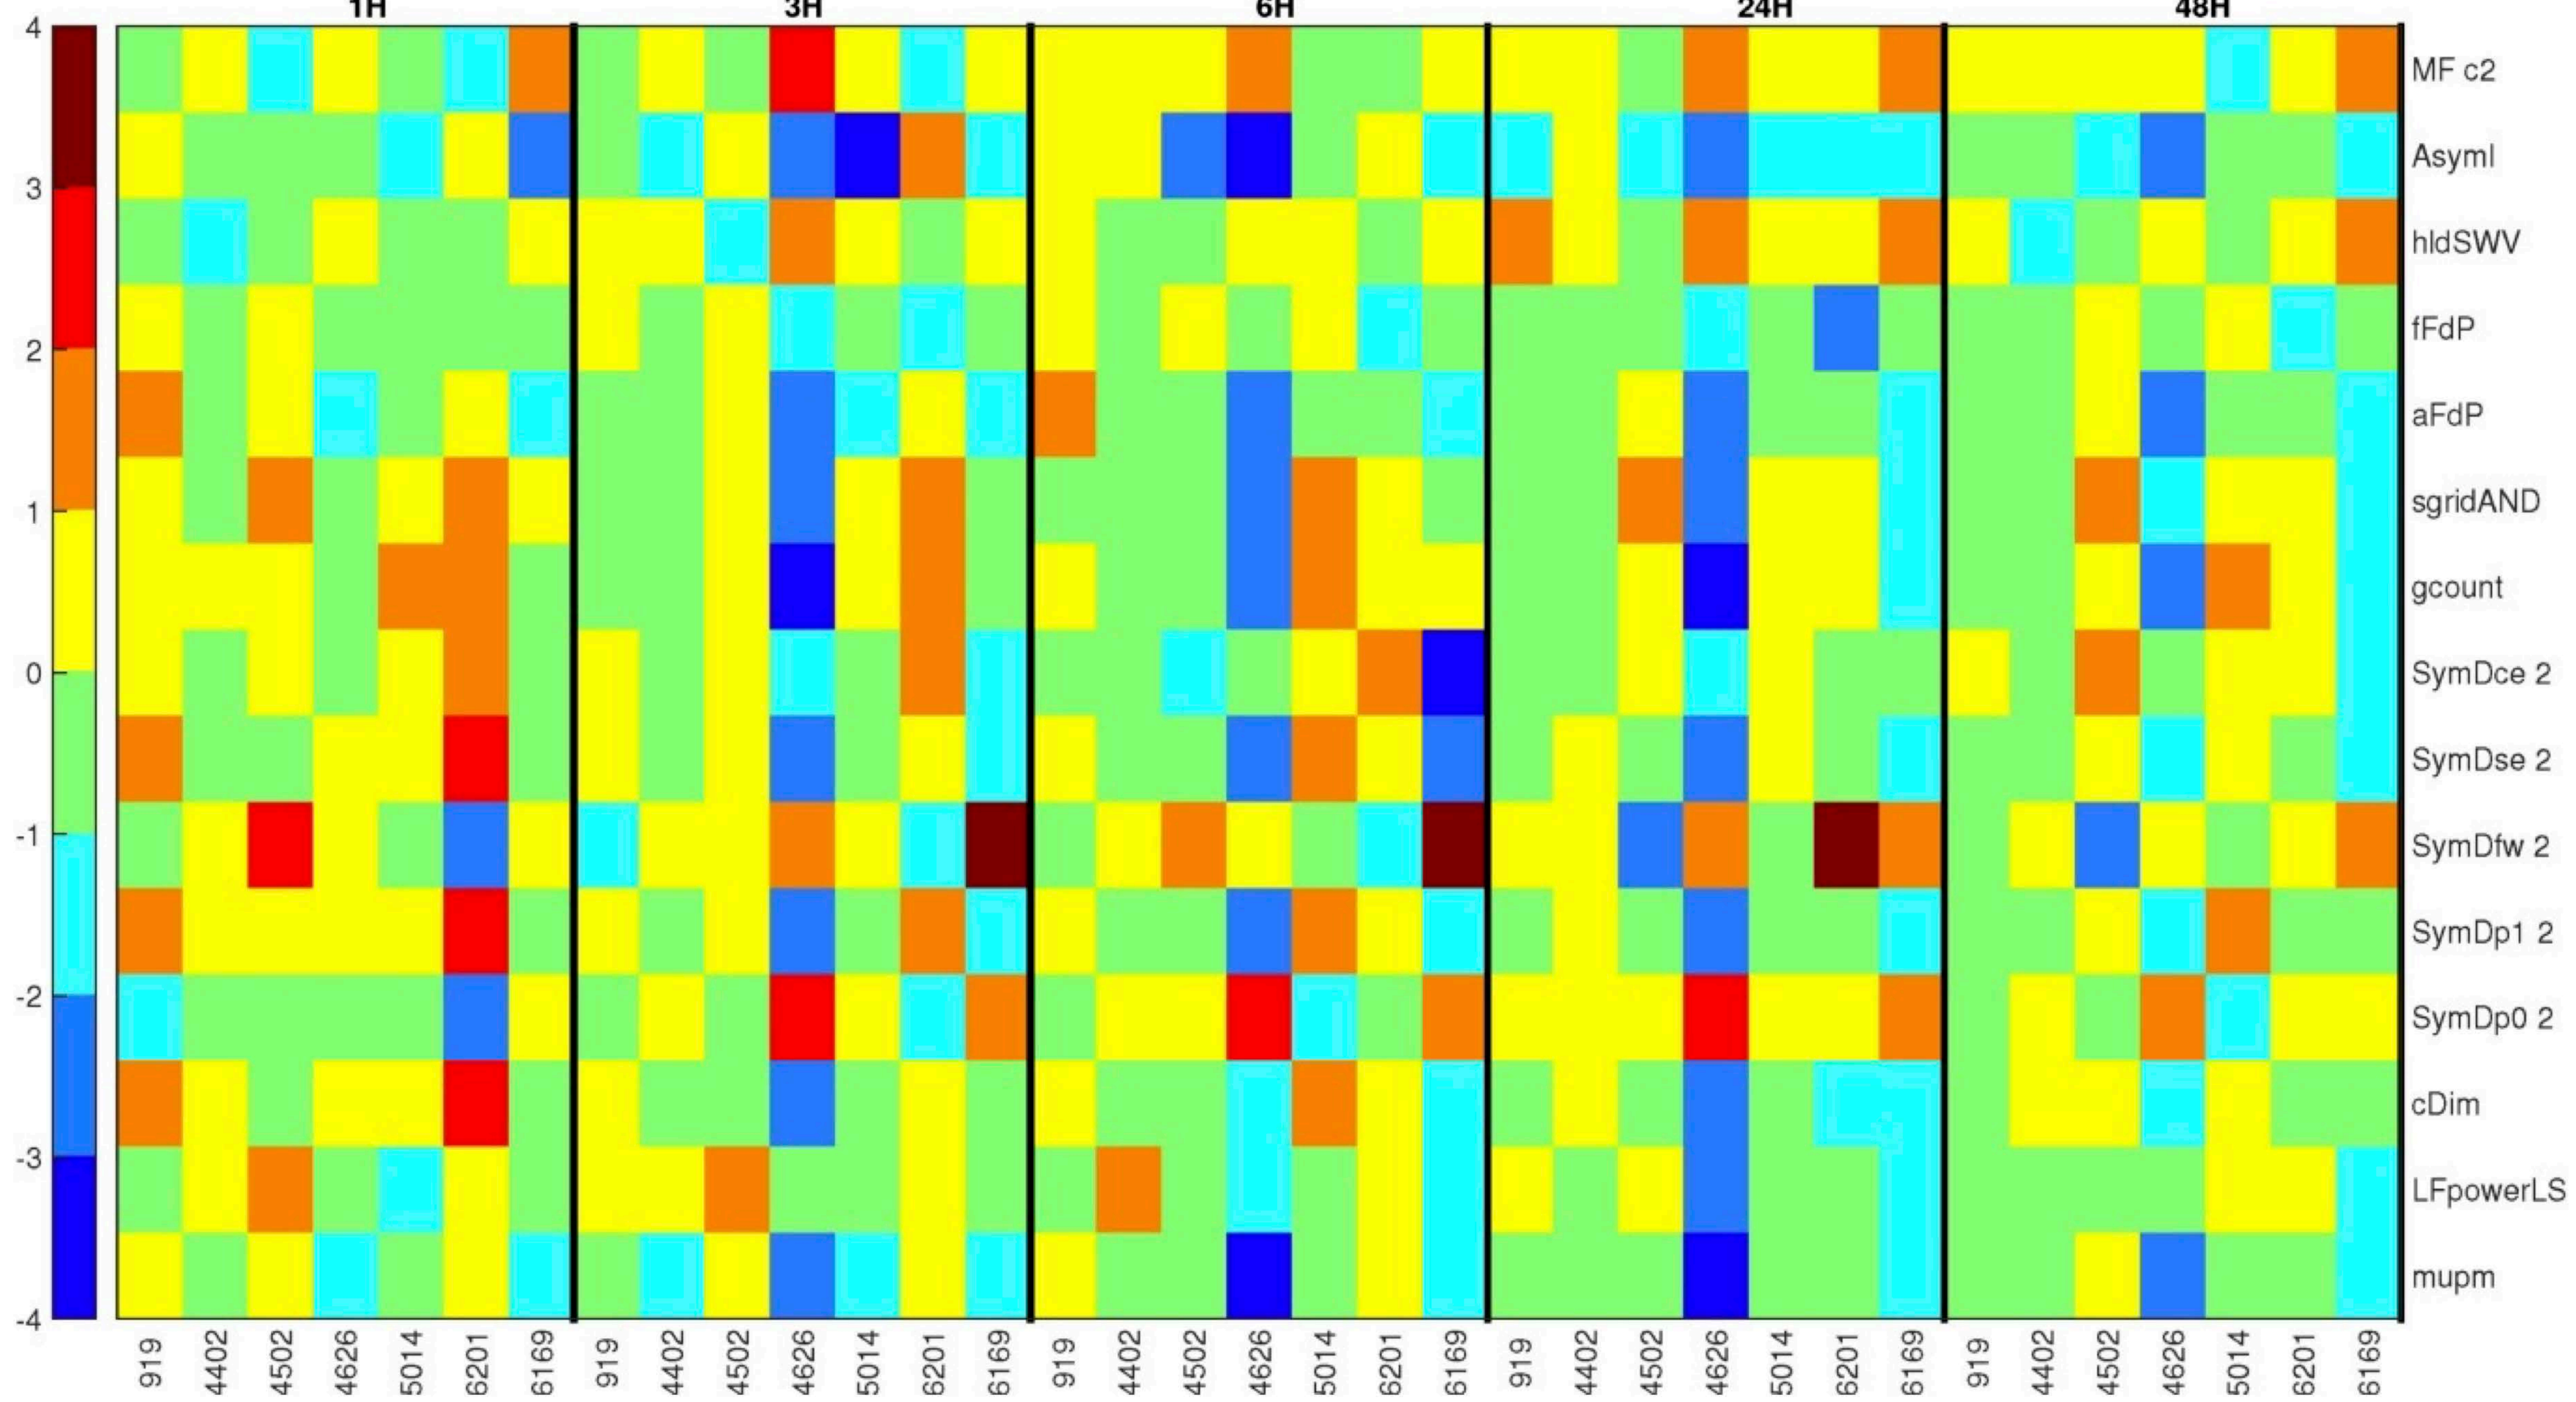

Supplement: pone.0153515.s001.pdf [file pone.0153515.s001.pdf]
