# Supplementary material for: Temporal Patterns in Sheep Fetal Heart Rate Variability Correlate to Systemic Cytokine Inflammatory Response: A Methodological Exploration of Monitoring Potential Using Complex Signals Bioinformatics
Source: PubMed Central journal article supplement (PMC4839772; doi:10.1371/journal.pone.0153515), 2016-04-21

**A**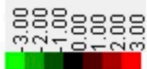**LPS****1H**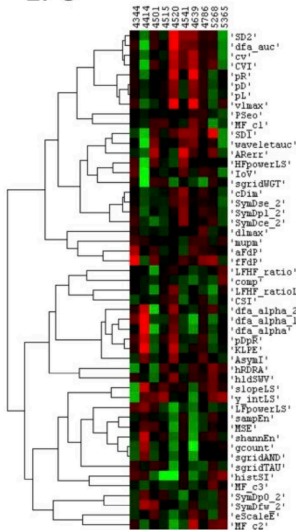**3H**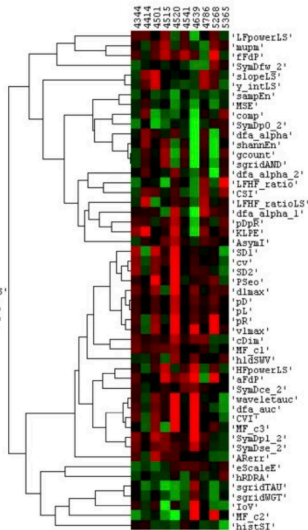**6H**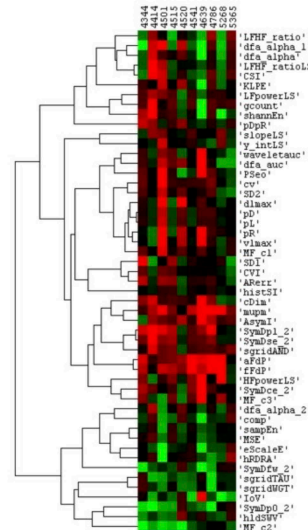**24H**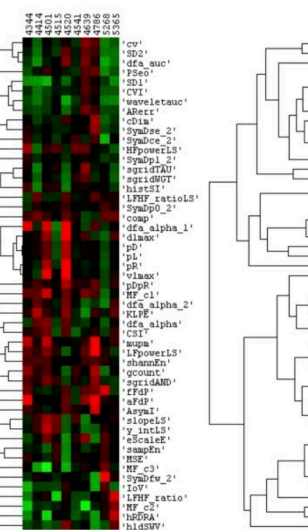**48H**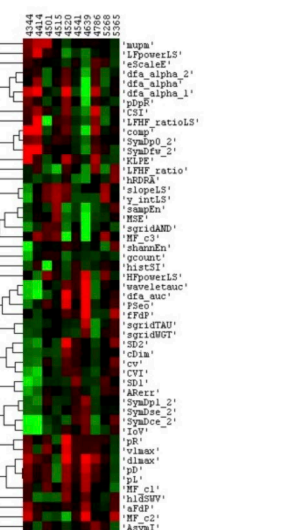**Control**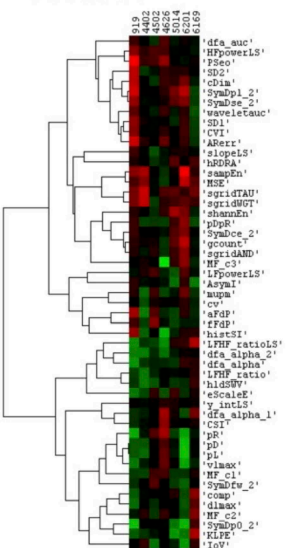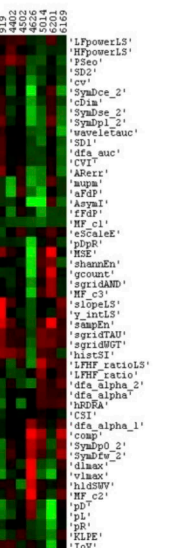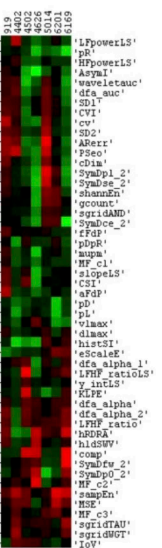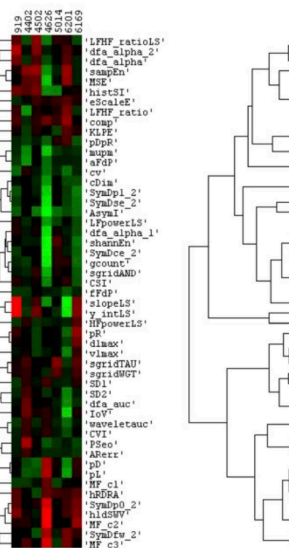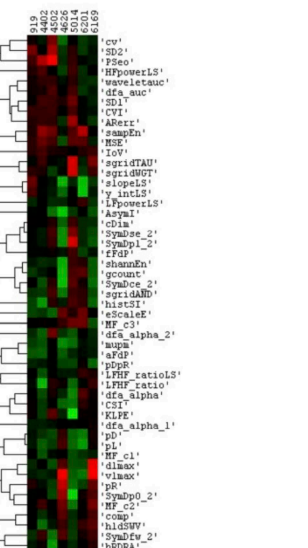

**B**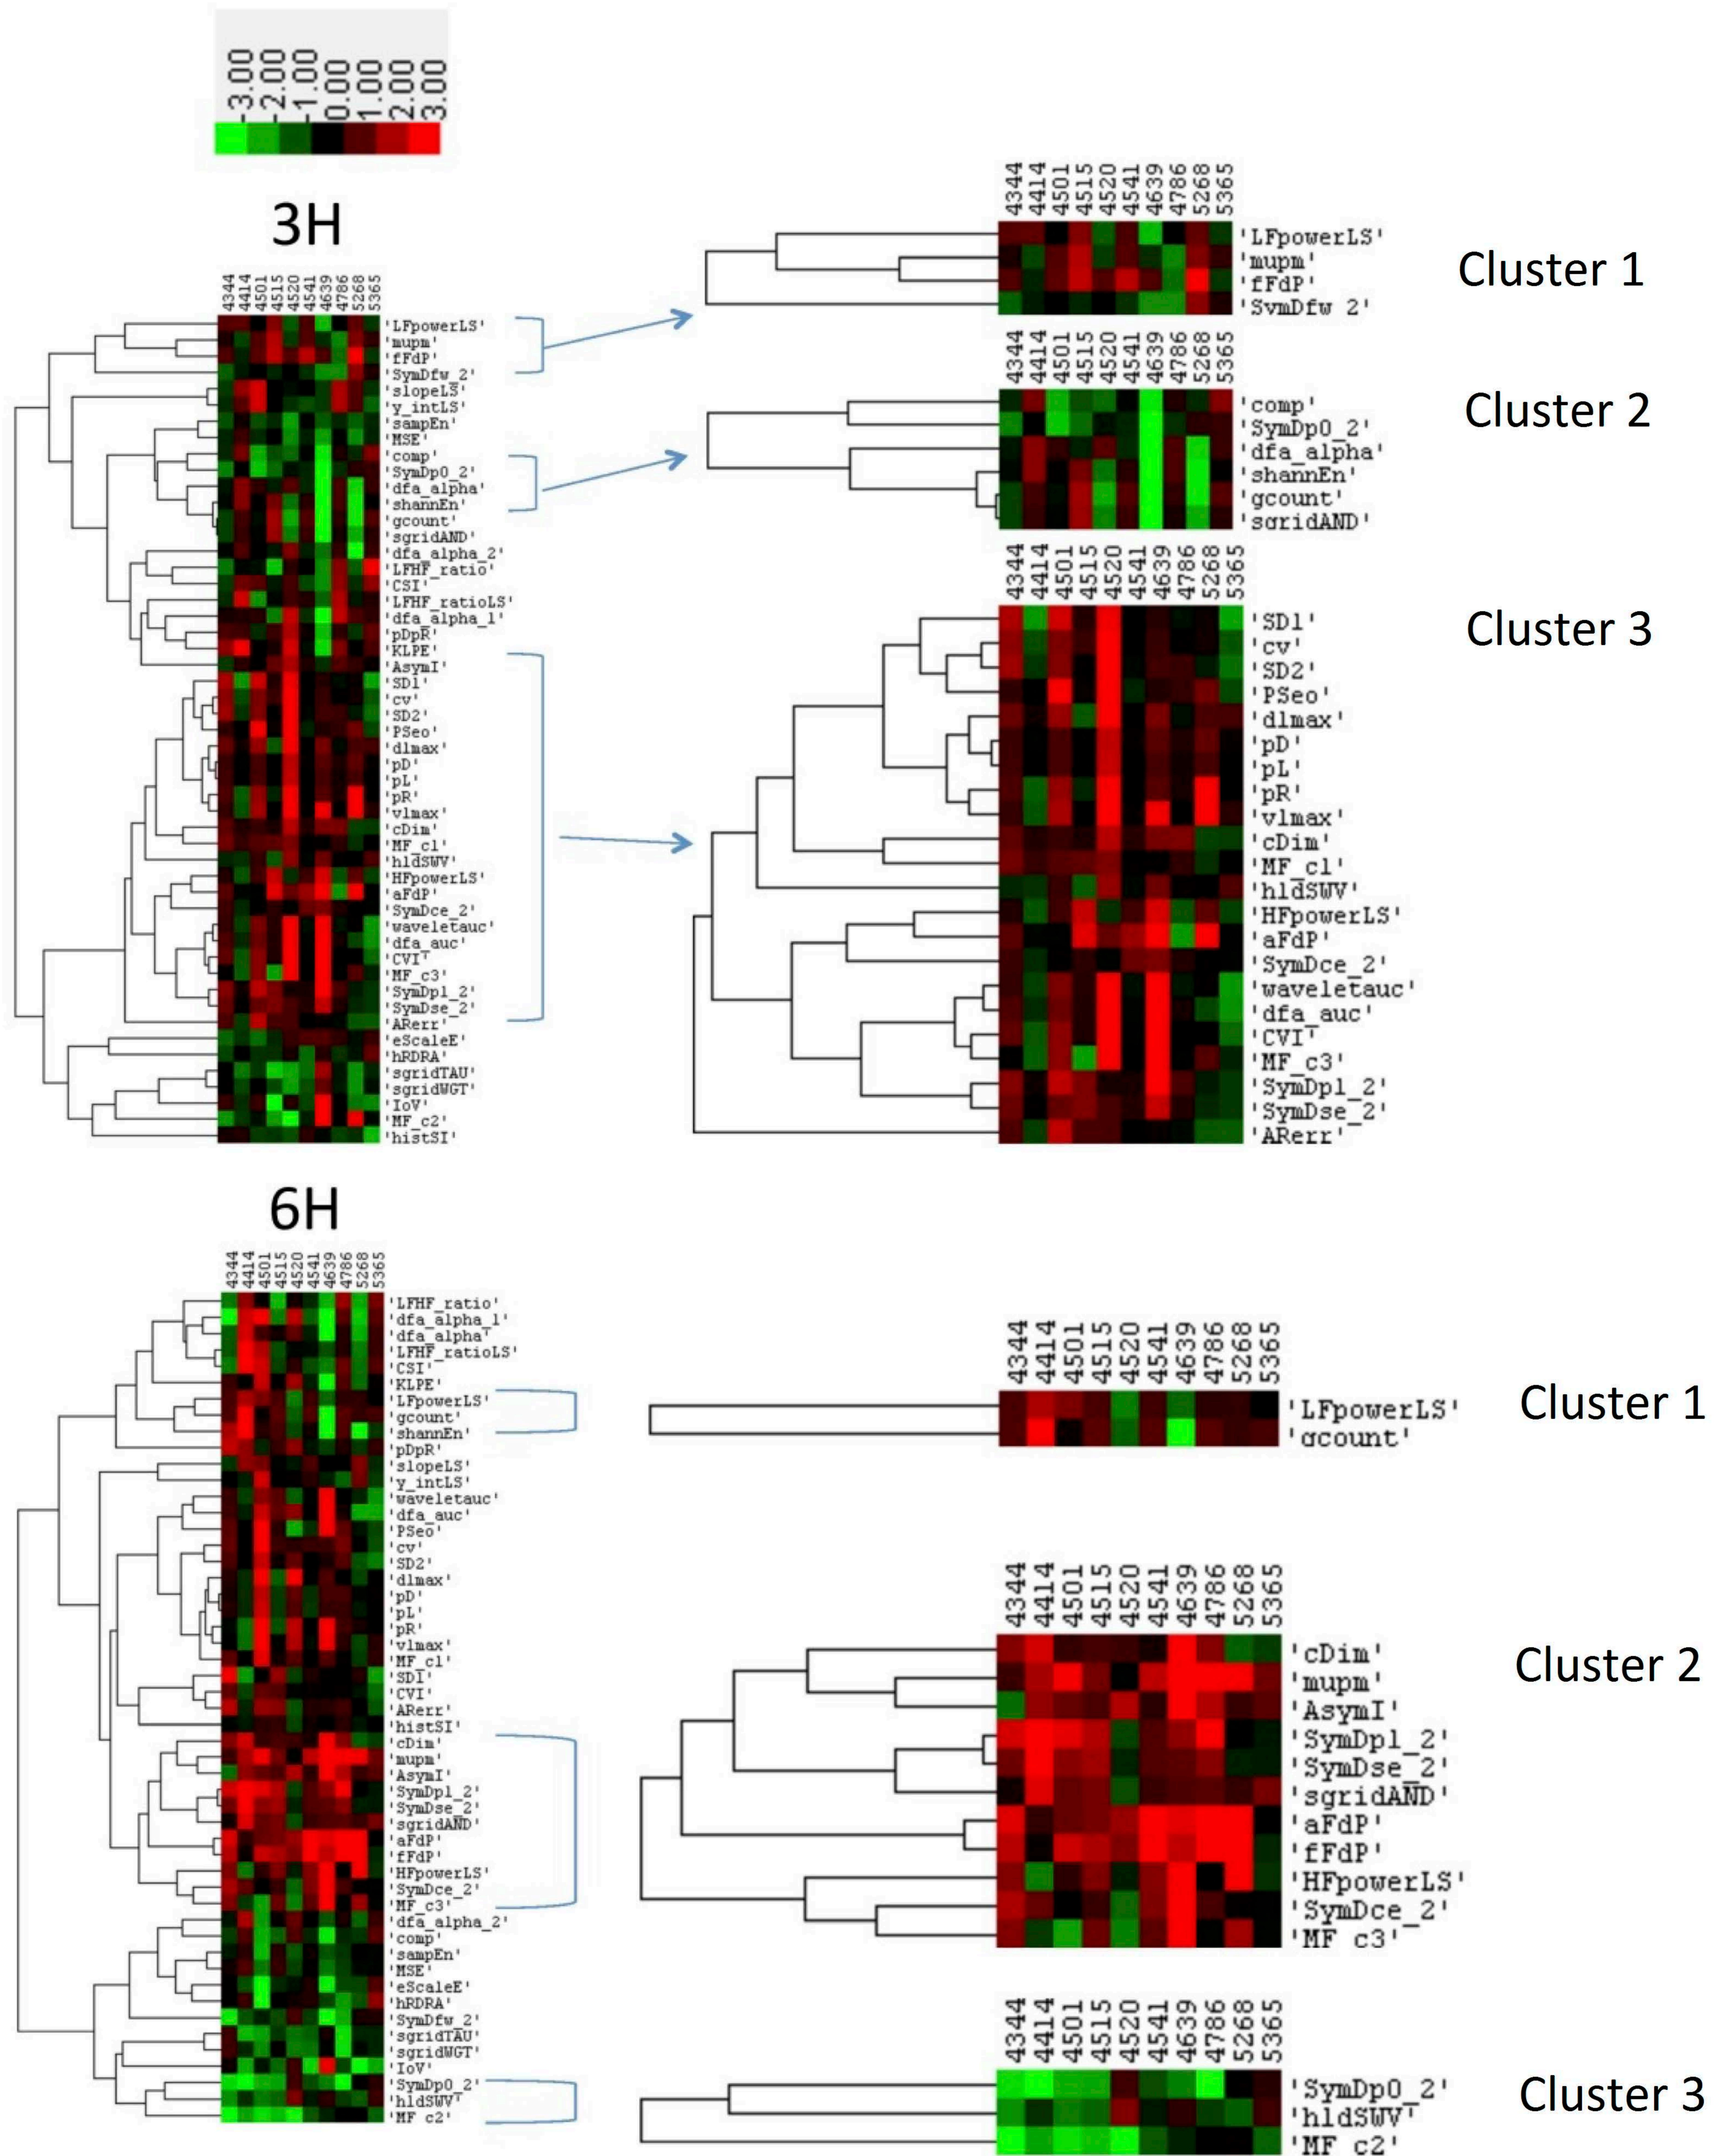

Supplement: pone.0153515.s002.pdf [file pone.0153515.s002.pdf]
